# Supplementary material for: C-entrapped Cu nanoparticles-infused polyaniline-modified cellulose nanofibers for the precise monitoring of xanthine in urine samples
Source: Royal Society of Chemistry journal article supplement (doi:10.1039/d3nj05380f), 2023-12-26
Supplement: d3nj05380f1.pdf [file d3nj05380f1.pdf]

## **Supporting Information**

### **C entrapped Cu nanoparticles-infused polyaniline modified cellulose nanofibers for precise monitoring of xanthine in urine samples**

Ahlam I. Al-Sulami<sup>1</sup>, Ammara Fatiam<sup>2</sup>, Fatimah Mohammad H. Al-Sulami<sup>1</sup>, Abdul Sami<sup>2</sup>,  
Reema H. Aldahiri<sup>1</sup>, Maria Khan<sup>2</sup>, Azza A. Al-Ghamdi<sup>1</sup>, Naeem Akhtar\*, Waleed Ahmed El  
Said<sup>\*\*1,3</sup>

*<sup>1</sup>University of Jeddah, College of Science, Department of Chemistry, Jeddah 21589, Saudi*

*Arabia*

*<sup>2</sup>Institute of Chemical Sciences, Bahauddin Zakariya University (BZU), Multan 60800, Pakistan*

*<sup>3</sup>Chemistry Department, Faculty of Science, Assiut University, Assiut, 71516, Egypt*

## Instrument details

Instruments used during this scientific work were Fourier transform infrared spectroscopy (FTIR) IRA affinity-1S spectrophotometer-USA to record FTIR spectra of cellulose acetate, polyaniline and cellulose acetate/polyaniline nanocomposite in the range of 400-4000  $\text{cm}^{-1}$ . X-ray diffraction (XRD) was measured by Rigaku, Mini flex-II-Japan by means of Cu K $\alpha$ . The chemical compositions and bond characters were characterized by XPS. X-Ray photoelectron spectroscopy was done at less than  $10^{-8}$  torr on AXIS Ultra DLD spectrometer by Kratos Analytical. The surface morphological analyses of the synthesized materials were analyzed using scanning electron microscopy (SEM) at a Zeiss Evo 50 XVP equipped with energy dispersive X-ray (EDAX) (Oxford instruments INCA, X.act, S.No. 56756, UK). Raman spectra was obtained using in Via Raman Microscope by RENISHAW UK with excitation laser of 514nm (laser power: 100%, grating: 1800 I/mm) and laser exposure time of 10s. Electrospinning machine (TONG LI TECH CO LTD, China) was used for the formation of nanofibers of PCE composite. All the electrochemical investigations were carried out using Gamry interface (1010E) Potentio state. Th is Potentio state instrument contains three electrodes such as working electrode, reference electrode and auxiliary electrode. In this work, synthesized electrode C@Cu-NPs/PCE was used as working electrode, Ag/AgCl used as reference electrode and platinum wire used as auxiliary electrode.

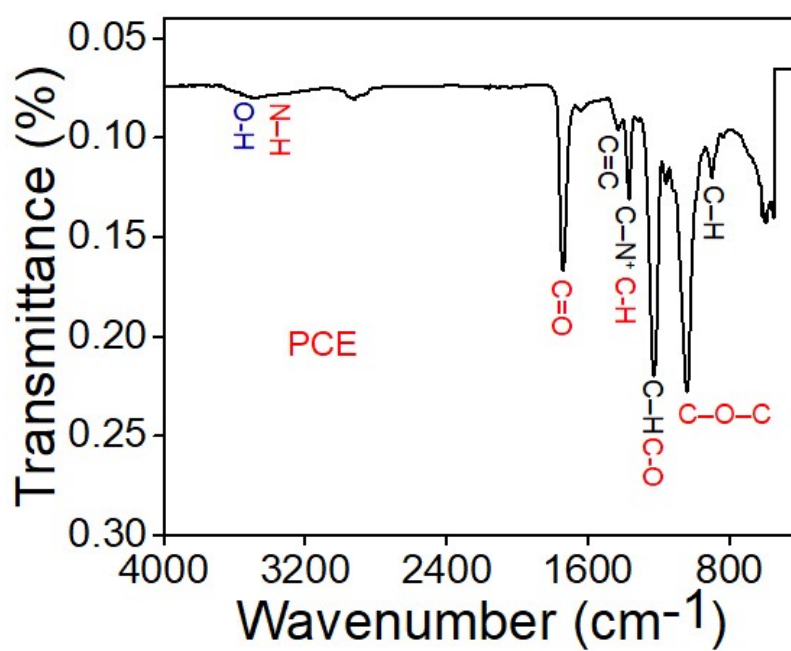

**Figure S1.** FTIR spectra showing clear formation of PCE.

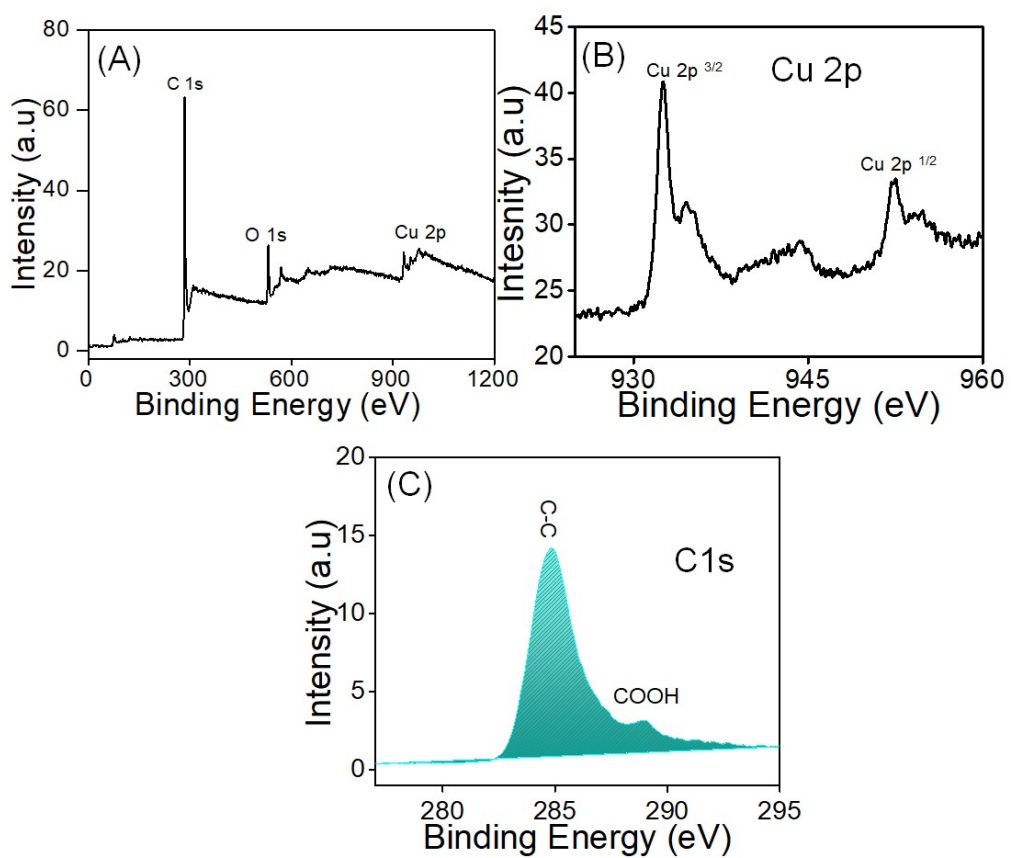

**Figure S2.** Shows XPS spectrum of C@Cu-NPs (A). High resolution spectrum of Cu 2p (B), and C 1s (C), respectively.

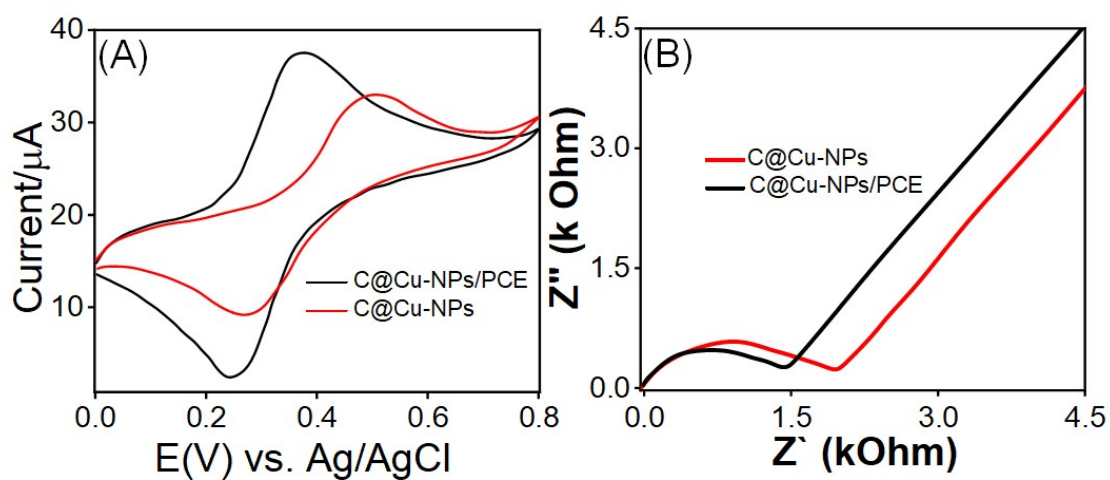

**Figure S3.** (A) CV of C@Cu-NPs/PCE and C@Cu-NPs in 0.1M PBS (pH:7) containing 2μM [Fe (CN)<sub>6</sub>]<sup>3-/4-</sup> with potential window ranging from 0 to +0.8 V at a scan rate of 100mVs<sup>-1</sup>. (B) EIS graph of C@Cu-NPs/PCE and C@Cu-NPs in 0.1M PBS (pH:7) containing 2μM [Fe(CN)<sub>6</sub>]<sup>3-/4-</sup>.

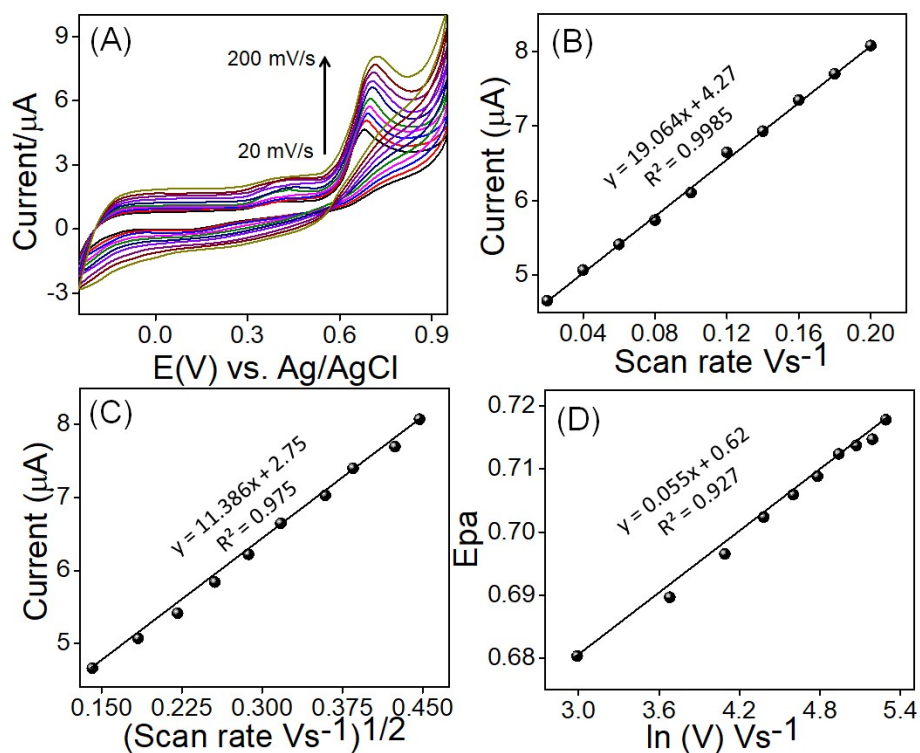

**Figure S4.** (A) CV patterns of C@Cu-NPs/PCE electrode towards 15  $\mu\text{M}$  Xn in 0.1 M PBS with different scan rates (20-200 mV/s). Graph (B) and (C) shows relation between scan rate versus peak current and square root of scan rate versus peak current, respectively. Graph (D) shows the relation between natural log of scan rate versus natural log of peak current.

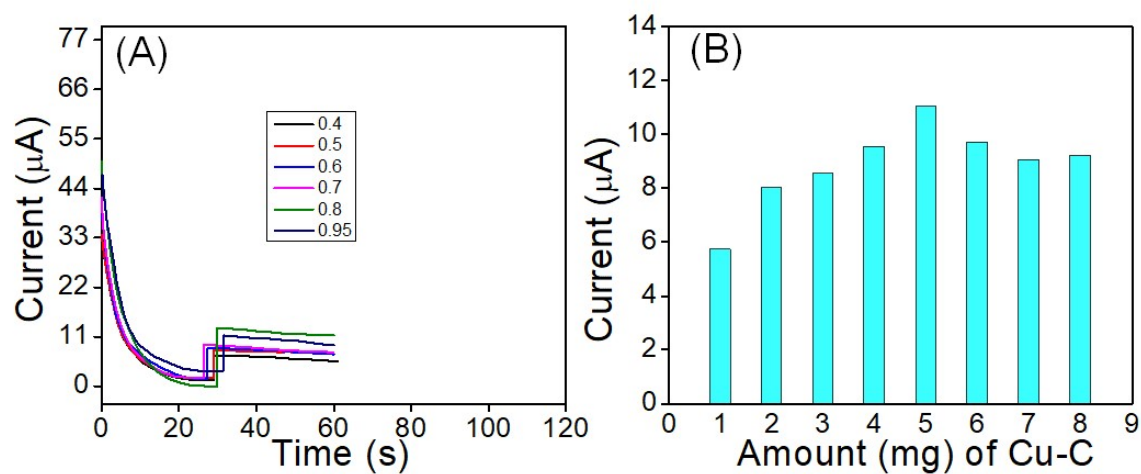

**Figure S5.** (A) Amperometric response of C@Cu-NPs/PCE at different potentials against 10 μM of Xn and (B) amperometric current response of designed electrode with different loading amount of Cu-C.

**Table S1.** Comparison of our developed electrode with the reported electrochemical sensors for the detection of Xn.

| Sr. No | Electrode                                                 | Linear Range ( $\mu\text{M}$ ) | Limit of Detection (LOD, $\mu\text{M}$ ) | Reference |
|--------|-----------------------------------------------------------|--------------------------------|------------------------------------------|-----------|
| 1.     | N-CQD@Fe <sub>2</sub> O <sub>3</sub> /MWCNT               | 0.5 – 177                      | 0.092                                    | [1]       |
| 2.     | MWCNT-AuNP-CCE                                            | 2.5 – 275                      | 0.063                                    | [2]       |
| 3.     | XOD/Co <sub>3</sub> O <sub>4</sub> NPs/CH/GR/GCE          | 0.5 – 80                       | 0.2                                      | [3]       |
| 4.     | GCE/PEDOT:PSS-AuNPs                                       | 0.05 – 10                      | 0.03                                     | [4]       |
| 5.     | PdNPs:pBG/AmSWCNTs/PG                                     | 0.001 – 150                    | 0.001                                    | [5]       |
| 6.     | 4B-PGE                                                    | 8 - 36                         | 0.4                                      | [6]       |
| 7.     | NFO/GCE                                                   | 0.5 – 30                       | 0.129                                    | [7]       |
| 8.     | Pt–Pd/NGPs/GCE                                            | 0.1 – 0.012                    | 3                                        | [8]       |
| 9.     | GCE/PDA-MWCNTs                                            | –                              | 0.05                                     | [9]       |
| 10.    | pPABSA/GCE                                                | 3 – 15                         | 0.35                                     | [10]      |
| 11.    | Pt@MIL-101(Cr)/GCE                                        | 0.5 – 162                      | 0.42                                     | [11]      |
| 12.    | PMo <sub>6</sub> W <sub>6</sub> /RGO-CeO <sub>2</sub> @Pt | 0.014                          | 1.25 – 100                               | [12]      |
| 13.    | Co/ZnO NPs/GCE                                            | 0.005 – 50                     | 0.0017                                   | [13]      |
| 14.    | EPPGE                                                     | 0.1 – 50                       | 0.06                                     | [14]      |
| 15.    | Au/OMCS                                                   | 0.10–20                        | 0.006                                    | [15]      |
| 16.    | C@Cu-NPs/PCE                                              | 5-180                          | 0.008                                    | This Work |

PPy = Polypyrrole

PGE = Pencil Graphite Electrode

CH = Chitosan

GR = Graphene

MWCNTs = Multi-walled Carbon Nanotubes

BQ = 1, 4-Benzoquinon

CCE = Carbon Ceramic Electrode

pBG = Poly-Bromocresol Green

amSWCNT = Amide Functionalized Single-Walled CNT

PG = Pyrolytic Graphite

NGP = Nanoporous Graphene Papers

PEDOT: PSS = Poly (3,4-ethylenedioxythiophene) Polystyrene Sulfonate

PDA = Polydopamine

pABSA = para-Amino Benzene Sulfonic Acid

EPPGE = Edge Plane Pyrolytic Graphite Electrode

OMCS = Ordered Mesoporous Carbon/Silica

SPCE = Screen Printed Carbon Electrode

## References

1. Ganesan, M., et al., *Synthesis of nitrogen-doped carbon quantum dots@ Fe<sub>2</sub>O<sub>3</sub>/multiwall carbon nanotubes ternary nanocomposite for the simultaneous electrochemical detection of 5-fluorouracil, uric acid, and xanthine*. Journal of Molecular Liquids, 2021. **331**: p. 115768.
2. Ferrag, C., M. Noroozifar, and K. Kerman, *Thiol functionalized carbon ceramic electrode modified with multi-walled carbon nanotubes and gold nanoparticles for simultaneous determination of purine derivatives*. Materials Science and Engineering: C, 2020. **110**: p. 110568.
3. Dalkiran, B., P.E. Erden, and E. Kılıç, *Construction of an electrochemical xanthine biosensor based on graphene/cobalt oxide nanoparticles/chitosan composite for fish freshness detection*. Journal of the Turkish Chemical Society Section A: Chemistry, 2017. **4**(1): p. 23-44.
4. Khan, M., M. Ahommed, and M. Daizy, *Detection of xanthine in food samples with an electrochemical biosensor based on PEDOT: PSS and functionalized gold nanoparticles*. RSC Advances, 2020. **10**(59): p. 36147-36154.
5. Raj, M., et al., *Simultaneous detection of ATP metabolites in human plasma and urine based on palladium nanoparticle and poly (bromocresol green) composite sensor*. Biosensors and Bioelectronics, 2019. **126**: p. 758-766.
6. Vishnu, N., et al., *Pencil graphite as an elegant electrochemical sensor for separation-free and simultaneous sensing of hypoxanthine, xanthine and uric acid in fish samples*. Analytical Methods, 2017. **9**(15): p. 2265-2274.

7. Durai, L. and S. Badhulika, *Facile synthesis of large area pebble-like  $\beta$ -NaFeO<sub>2</sub> perovskite for simultaneous sensing of dopamine, uric acid, xanthine and hypoxanthine in human blood*. Materials Science and Engineering: C, 2020. **109**: p. 110631.
8. Wang, M., et al., *Pt-Pd Bimetallic Nanoparticles Decorated Nanoporous Graphene as a Catalytic Amplification Platform for Electrochemical Detection of Xanthine*. Electroanalysis, 2017. **29**(5): p. 1258-1266.
9. Shahbakhsh, M., S. Narouie, and M. Noroozifar, *Modified glassy carbon electrode with Polydopamine-multiwalled carbon nanotubes for simultaneous electrochemical determination of biocompounds in biological fluids*. Journal of pharmaceutical and biomedical analysis, 2018. **161**: p. 66-72.
10. Jesny, S. and K. Girish Kumar, *Non-enzymatic Electrochemical Sensor for the Simultaneous Determination of Xanthine, its Methyl Derivatives Theophylline and Caffeine as well as its Metabolite Uric Acid*. Electroanalysis, 2017. **29**(7): p. 1828-1837.
11. Zhang, L., et al., *A non-enzymatic voltammetric xanthine sensor based on the use of platinum nanoparticles loaded with a metal-organic framework of type MIL-101 (Cr). Application to simultaneous detection of dopamine, uric acid, xanthine and hypoxanthine*. Microchimica Acta, 2019. **186**(1): p. 1-10.
12. Zhu, D., et al., *Facile fabrication of a non-enzymatic nanocomposite of heteropolyacids and CeO<sub>2</sub>@ Pt alloy nanoparticles doped reduced graphene oxide and its application towards the simultaneous determination of xanthine and uric acid*. Electrochimica Acta, 2018. **266**: p. 54-65.
13. Rahman, M.M., H.B. Balkhoyor, and A.M. Asiri, *Ultra-sensitive xanthine sensor development based on wet-chemically prepared co/ZnO nanoparticles*. Materials Express, 2017. **7**(2): p. 93-103.
14. Pierini, G.D., et al., *Development of an electroanalytical method to control quality in fish samples based on an edge plane pyrolytic graphite electrode. Simultaneous determination of hypoxanthine, xanthine and uric acid*. Microchemical Journal, 2018. **138**: p. 58-64.
15. Wang, Y., et al., *Monodispersed gold nanoparticles entrapped in ordered mesoporous carbon/silica nanocomposites as xanthine oxidase mimic for electrochemical sensing of xanthine*. Microchimica Acta, 2020. **187**(10): p. 1-9.
